# Supplementary material for: Functional Repetitive Neuromuscular Magnetic Stimulation (frNMS) Targeting the Tibialis Anterior Muscle in Children with Upper Motor Neuron Syndrome: A Feasibility Study
Source: MDPI journal article supplement (doi:10.3390/children10101584), 2023-09-22
Supplement: s1 [file s1]

**Supplemental Figure S1:** Questionnaires for participants and their caregivers used to assess the satisfaction with the frNMS treatment

### Patient's questionnaire after every second session

1. This questionnaire was filled in by:

1 me

1 my parent/a third person

2. This questionnaire was filled in on: \_\_\_\_\_

3. Were you positioned comfortably during the session?

1 Yes

1 No, because \_\_\_\_\_

\_\_\_\_\_

4. How did the treatment feel?

\_\_\_\_\_

\_\_\_\_\_

5. Did you experience any pain or discomfort during the session?

1 Yes; please specify the severity of the pain using the emoticons below and let us know, where you experienced pain:

\_\_\_\_\_

\_\_\_\_\_

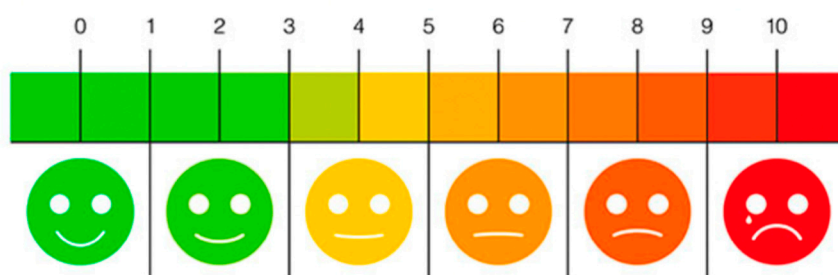

☐ No

6. Would you repeat this treatment?

1 Yes

1 No, because... \_\_\_\_\_  
\_\_\_\_\_

7. Does the treated body part feel different now?

1 Yes, how?

\_\_\_\_\_  
\_\_\_\_\_

1 No

8. Does any other body part feel different now (sensation of heat, itching, burning)?

1 Yes, where? \_\_\_\_\_  
\_\_\_\_\_

1 No

9. Further comments:

\_\_\_\_\_  
\_\_\_\_\_  
\_\_\_\_\_  
\_\_\_\_\_

Thank you very much for answering these questions and for your feedback!

## Questionnaire for patients after the treatment with rNMS

Study-ID: \_\_\_\_\_

1. This questionnaire was filled in by:

1 me

☐ caregiver/a third person

2. This questionnaire was filled in on: \_\_\_\_\_

3. Overall, how did you experience the treatment?

---

---

4. Would you undergo the treatment again?

1 Yes

1 No, because \_\_\_\_\_

---

5. Does the treated body region feel different in comparison to before the intervention?

1 Yes, how?

---

---

1 No

6. Does any other body region feel different in comparison to before the intervention?

1 Yes, where?

---

---

1 No

7. Would you recommend this treatment method to other children/adolescents with movement restrictions?

1 Yes

1 No, because \_\_\_\_\_

---

8. Could/Should we have done anything differently during the treatment?

1 Yes, what?

---

---

1 No

10. Further comments:

---

---

---

---

Thank you for completing the questionnaire!

## Questionnaire for caregivers at the end of the patients' rNMS treatment

Study-ID: \_\_\_\_\_

1. This questionnaire was filled in by: 1 Mother      1 Father
2. This questionnaire was filled in on: \_\_\_\_\_
3. Do you notice a difference in your child's behavior in comparison to before the treatment?  
1 No  
1 Yes, which?

\_\_\_\_\_

\_\_\_\_\_

4. Did your child comment on how it liked the treatment?  
1 No  
1 Yes, how?

\_\_\_\_\_

\_\_\_\_\_

5. Did your child complain about pain or other sufferings (headache, pain in legs, bottom or hip etc.)?

- 1 No  
1 Yes, where and what?

\_\_\_\_\_

\_\_\_\_\_

6. Would you let your child undergo the treatment again?

1 Yes

1 No, because \_\_\_\_\_

\_\_\_\_\_

7. Would you recommend this therapy to other families with children with movement restrictions?

1 Yes

1 No, because \_\_\_\_\_

8. Do you have any ideas to improve the process?

1 No

1 Yes, which?

\_\_\_\_\_

\_\_\_\_\_

9. Further comments:

\_\_\_\_\_

\_\_\_\_\_

\_\_\_\_\_

\_\_\_\_\_

Thank you for completing the questionnaire!

**Supplemental Figure S2:** Treatment documentation questionnaire, completed prior and after every session assess any adverse events occurring during or after treatment session

## **frNMS Treatment Documentation**

**Study-ID:** \_\_\_\_\_

**Session Nr.:** \_\_\_\_\_

**Date:** \_\_\_\_\_

**1. Did the last rNMS session cause any adverse events? If so, ...**

**... which did you notice?**

- ☐ Pain
- ☐ Feelings of Pressure
- ☐ Muscle Sore
- ☐ Muscle Tremor
- ☐ Tingle
- ☐ Numbness
- ☐ Cold Feelings
- ☐ Warm Feelings
- ☐ Burning Sensation
- ☐ Furry Feelings
- ☐ Other Adverse Events: \_\_\_\_\_

☐ No

**... when did they occur?**

- ☐ In Motion
- ☐ While Resting
- ☐ Constantly/Always

**... how strong were they (VAS 0-10)?** \_\_\_\_\_

**... how long did they last?** \_\_\_\_\_

**2. Did the patient feel pain in hip or legs before the beginning of the session?**

- ☐ No
- ☐ Yes

**3. Did the patient report any adverse events or unpleasant sensations during the rNMS session? If so, ...**

**... which occurred?**

- ☐ Pain
- ☐ Feelings of Pressure
- ☐ Muscle Sore
- ☐ Muscle Tremor
- ☐ Tingle
- ☐ Numbness
- ☐ Cold Feelings
- ☐ Warm Feelings
- ☐ Burning Sensation
- ☐ Furry Feelings
- ☐ Other Adverse Events: \_\_\_\_\_

- ☐ No

**Supplemental Table S1: Feedback given by therapists, patients and caregivers during the study period.** Any pronouns were replaced by “child” to ensure anonymity. Abbreviations: CG = Caregiver, Pat.=patient, T: Therapist

| Participant | Feedback by whom and when   | Comment                                                                                 |
|-------------|-----------------------------|-----------------------------------------------------------------------------------------|
| <b>1</b>    | T after SPC                 | Pronounced improvement of motor control, active movement execution visible              |
|             | CG after SPC                | More sessions would be desired to better see positive results                           |
| <b>2</b>    | CG after SPA                | Very child-friendly setting                                                             |
| <b>3</b>    | Pat after session 5 & 8 SPA | My leg feels different – in a good way                                                  |
|             | CG after SPA                | Child is looking forward to every session.                                              |
|             | Pat during SPC              | Very cool!                                                                              |
|             | CG after SPC                | Child was excited for every session. Amazing intervention, we would repeat it any time. |
| <b>4</b>    | CG after SPA                | Child had a lot of fun.                                                                 |
|             | Pat during SPC about frNMS  | This was really cool, I want to do it again.                                            |
|             | CG after SPC                | Child enjoyed the treatment a lot.                                                      |
| <b>5</b>    | CG after SPA                | The treatment was received well by child.                                               |
|             | Pat after session 2 SPC     | Lifting my foot is easier now.                                                          |



|           |                          |                                                                                                                                                                                                                     |
|-----------|--------------------------|---------------------------------------------------------------------------------------------------------------------------------------------------------------------------------------------------------------------|
|           | CG after SPC             | Child liked all the sessions                                                                                                                                                                                        |
|           | Pat after SPC            | I can lift my toes better.                                                                                                                                                                                          |
| <b>6</b>  | Pat during SPA           | I feel more tired in general.                                                                                                                                                                                       |
|           | CG after SPA             | Child liked it.                                                                                                                                                                                                     |
|           | Pat after session 6, SPC | The treatment feels good.                                                                                                                                                                                           |
|           | CG after SPC             | Child liked it a lot, it was fun for him, sometimes strenuous, but child likes to do stuff like that!                                                                                                               |
| <b>7</b>  | CG after SPA             | Child enjoyed the treatment and spoke positively about it.                                                                                                                                                          |
|           | Pat after session 2 SPC  | My foot feels cool                                                                                                                                                                                                  |
|           | Pat after SPC            | My foot is a lot better now, but can't exactly say, in what way.                                                                                                                                                    |
|           | CG after SPC             | Child is able to better and easier lift the foot. In the beginning [of frNMS] child was fascinated and thrilled, in the end, it was little much with the other therapies.                                           |
| <b>9</b>  | Pat during SPA           | More momentum upwards and more strength when I'm pressing down my foot. I enjoy this a lot! Walking is better, my foot feels way better than usual.                                                                 |
|           | CG after SPA             | Child was looking forward to every session all day, child spoke very positively, and the foot got a little better every day. Child could touch the foot down without orthoses more controlled after the first days. |
|           | Pat during and after SPC | This feels really good and very nice. It helps my foot; I can walk better/more beautifully now. Maybe sometimes, we could take a break with the stimulation.                                                        |
|           | CG after SPC             | Child's gait worsened a little bit when not wearing orthoses, but child wasn't wearing orthoses at all during this week, so maybe it's due to exhaustion. Child enjoyed it a lot and was always very motivated.     |
| <b>10</b> | Pat after SPA            | Walking on my heels works better now.                                                                                                                                                                               |
|           | CG after SPA             | Child is able to walk better and longer. More endurance, less tripping! Child likes the therapist a lot, talks a lot about the treatment and enjoy it.                                                              |
|           | CG after SPC             | In the beginning, child liked it lot, towards the end he was often tired, there were a lot of other therapies as well.                                                                                              |
| <b>11</b> | Pat after SPA            | My foot/leg feels stronger now.                                                                                                                                                                                     |
|           | Pat during and after SPC | The muscle feels more at ease, it's easier to move. My foot feels more relaxed. It feels much better.                                                                                                               |
|           | CG after SPC             | Child's foot is more relaxed, not as tense.                                                                                                                                                                         |
| <b>12</b> | Pat during and after SPA | My foot feels better, I have more power when playing soccer.                                                                                                                                                        |
|           | CG after SPA             | Interesting, fun, challenging (in a good way) according to child.                                                                                                                                                   |

|  |                |                                                                                                                                                                                         |
|--|----------------|-----------------------------------------------------------------------------------------------------------------------------------------------------------------------------------------|
|  | Pat after SPC. | frNMS feels cool, my foot and lower leg feel better, but I can't describe how. My foot doesn't feel smaller than the other one anymore.                                                 |
|  | T during SPC   | Throughout frNMS-period, it got easier to find the right location to stimulate, muscle contracts more pronounced, desired movement is executed by patient more pronounced and smoother. |
|  | CG after SPC   | Climbing stairs has improved. Child was thrilled and motivated every day.                                                                                                               |
